# Supplementary material for: Walking and non-motorized vehicle use in adolescents: the role of neighborhood environment perceptions across urbanization levels
Source: Springer Nature journal article supplement (doi:10.1007/s12662-023-00931-5), 2024-01-03
Supplement: MOESM1 [file 26588690]

Table 1: Descriptive statistics of the sample stratified by MoMo measurement wave

| **characteristic** | **MoMo Wave 2  (2014-2017),  n = 2,894** | **MoMo Wave 3,  (2018-2020)  n = 1,082** | **Overall, n = 3,976** |
| --- | --- | --- | --- |
| age1 | 14.57 (1.99) | 14.32 (2.00) | 14.50 (1.99) |
| gender |  |  |  |
| male | 1,392 (48%) | 543 (50%) | 1,935 (49%) |
| female | 1,502 (52%) | 539 (50%) | 2,041 (51%) |
| socioeconomic status1, 2 | 14.0 (3.8) | 15.2 (3.3) | 14.3 (3.7) |
| urbanicity level |  |  |  |
| rural | 580 (20%) | 220 (20%) | 800 (20%) |
| small town | 1,004 (35%) | 319 (29%) | 1,323 (33%) |
| medium-sized town | 836 (29%) | 300 (28%) | 1,136 (29%) |
| city | 474 (16%) | 243 (22%) | 717 (18%) |
| walking |  |  |  |
| almost never | 102 (3.5%) | 37 (3.4%) | 139 (3.5%) |
| less than 1 km (<15 min) per day | 459 (16%) | 145 (13%) | 604 (15%) |
| 1-2 km (15-30 min) per day | 1,185 (41%) | 436 (40%) | 1,621 (41%) |
| 3-5 km (30-60 min) per day | 903 (31%) | 367 (34%) | 1,270 (32%) |
| 6-10 km (1-2 h) per day | 212 (7.3%) | 82 (7.6%) | 294 (7.4%) |
| more than 10 km (>2 h) per day | 33 (1.1%) | 15 (1.4%) | 48 (1.2%) |
| non-motorized vehicle use |  |  |  |
| (almost) no cycling, longboarding, etc. | 772 (27%) | 321 (30%) | 1,093 (27%) |
| less than 1km per day | 528 (18%) | 163 (15%) | 691 (17%) |
| 1-5km (<10 min) per day | 802 (28%) | 352 (33%) | 1,154 (29%) |
| 6-10km (10-30min) per day | 611 (21%) | 191 (18%) | 802 (20%) |
| 11-20km (30-60 min) per day | 161 (5.6%) | 42 (3.9%) | 203 (5.1%) |
| more than 20km (>60min) per day | 20 (0.7%) | 13 (1.2%) | 33 (0.8%) |

All measures are in format n (column-wise %) unless specified otherwise; 1 Mean (standard deviation), 2 Socioeconomic status is measured on a scale from 3 to 21, with higher values indicating a higher socioeconomic status
