# Supplementary material for: Walking and non-motorized vehicle use in adolescents: the role of neighborhood environment perceptions across urbanization levels
Source: Springer Nature journal article supplement (doi:10.1007/s12662-023-00931-5), 2024-01-03
Supplement: MOESM2 [file 26588690]

Table 2: Descriptive statistics (n (%)) of the perceived environment characteristics

| **characteristic** | **rural,  n = 800** | **small town,  n = 1,323** | **medium-sized town,  n = 1,136** | **city,  n = 717** | **overall,  n = 3,976** |
| --- | --- | --- | --- | --- | --- |
| There are sports facilities that are always accessible (e.g. soccer fields) in my neighbourhood. |  |  |  |  |  |
| none | 78 (9.8%) | 96 (7.3%) | 103 (9.1%) | 52 (7.3%) | 329 (8.3%) |
| few | 415 (52%) | 622 (47%) | 465 (41%) | 270 (38%) | 1,772 (45%) |
| some | 263 (33%) | 511 (39%) | 480 (42%) | 316 (44%) | 1,570 (39%) |
| many | 44 (5.5%) | 94 (7.1%) | 88 (7.7%) | 79 (11%) | 305 (7.7%) |
| There are sports clubs in my neighbourhood. |  |  |  |  |  |
| none | 53 (6.6%) | 61 (4.6%) | 75 (6.6%) | 38 (5.3%) | 227 (5.7%) |
| few | 313 (39%) | 345 (26%) | 243 (21%) | 202 (28%) | 1,103 (28%) |
| some | 350 (44%) | 695 (53%) | 583 (51%) | 337 (47%) | 1,965 (49%) |
| many | 84 (11%) | 222 (17%) | 235 (21%) | 140 (20%) | 681 (17%) |
| There are commercial sports providers (e.g. fitness clubs) in my neighbourhood. |  |  |  |  |  |
| none | 280 (35%) | 313 (24%) | 159 (14%) | 105 (15%) | 857 (22%) |
| few | 368 (46%) | 504 (38%) | 348 (31%) | 263 (37%) | 1,483 (37%) |
| some | 143 (18%) | 438 (33%) | 497 (44%) | 285 (40%) | 1,363 (34%) |
| many | 9 (1.1%) | 68 (5.1%) | 132 (12%) | 64 (8.9%) | 273 (6.9%) |
| There are playgrounds in my neighbourhood. |  |  |  |  |  |
| none | 42 (5.3%) | 50 (3.8%) | 27 (2.4%) | 11 (1.5%) | 130 (3.3%) |
| few | 388 (49%) | 478 (36%) | 356 (31%) | 194 (27%) | 1,416 (36%) |
| some | 316 (40%) | 575 (43%) | 537 (47%) | 330 (46%) | 1,758 (44%) |
| many | 54 (6.8%) | 220 (17%) | 216 (19%) | 182 (25%) | 672 (17%) |
| There are enough pavements and pavements in my neighbourhood for safe walking. |  |  |  |  |  |
| none | 32 (4.0%) | 51 (3.9%) | 12 (1.1%) | 12 (1.7%) | 107 (2.7%) |
| few | 72 (9.0%) | 97 (7.3%) | 42 (3.7%) | 22 (3.1%) | 233 (5.9%) |
| some | 266 (33%) | 318 (24%) | 235 (21%) | 113 (16%) | 932 (23%) |
| many | 430 (54%) | 857 (65%) | 847 (75%) | 570 (79%) | 2,704 (68%) |
| There are cycling paths in my neighbourhood. |  |  |  |  |  |
| none | 160 (20%) | 211 (16%) | 103 (9.1%) | 80 (11%) | 554 (14%) |
| few | 226 (28%) | 432 (33%) | 277 (24%) | 187 (26%) | 1,122 (28%) |
| some | 308 (39%) | 430 (33%) | 448 (39%) | 268 (37%) | 1,454 (37%) |
| many | 106 (13%) | 250 (19%) | 308 (27%) | 182 (25%) | 846 (21%) |
| There are other children playing sports outside in my neighbourhood |  |  |  |  |  |
| none | 52 (6.5%) | 71 (5.4%) | 64 (5.6%) | 25 (3.5%) | 212 (5.3%) |
| few | 235 (29%) | 363 (27%) | 299 (26%) | 173 (24%) | 1,070 (27%) |
| some | 381 (48%) | 611 (46%) | 515 (45%) | 347 (48%) | 1,854 (47%) |
| many | 132 (17%) | 278 (21%) | 258 (23%) | 172 (24%) | 840 (21%) |
| How safe are the public leisure time facilities in the area you live in (in terms of problems with crime)? |  |  |  |  |  |
| very unsafe | 7 (0.9%) | 15 (1.1%) | 11 (1.0%) | 6 (0.8%) | 39 (1.0%) |
| rather unsafe | 46 (5.8%) | 81 (6.1%) | 102 (9.0%) | 76 (11%) | 305 (7.7%) |
| rather safe | 374 (47%) | 733 (55%) | 720 (63%) | 411 (57%) | 2,238 (56%) |
| very safe | 373 (47%) | 494 (37%) | 303 (27%) | 224 (31%) | 1,394 (35%) |
| For walking and riding a bicycle, my neighbourhood is ... |  |  |  |  |  |
| very uncomfortable | 1 (0.1%) | 8 (0.6%) | 7 (0.6%) | 7 (1.0%) | 23 (0.6%) |
| rather uncomfortable | 39 (4.9%) | 64 (4.8%) | 70 (6.2%) | 69 (9.6%) | 242 (6.1%) |
| rather comfortable | 320 (40%) | 574 (43%) | 550 (48%) | 320 (45%) | 1,764 (44%) |
| very comfortable | 440 (55%) | 677 (51%) | 509 (45%) | 321 (45%) | 1,947 (49%) |
| Cars drive in the neighbourhood where I live. |  |  |  |  |  |
| none | 4 (0.5%) | 1 (<0.1%) | 0 (0%) | 2 (0.3%) | 7 (0.2%) |
| few | 211 (26%) | 261 (20%) | 170 (15%) | 97 (14%) | 739 (19%) |
| some | 366 (46%) | 623 (47%) | 539 (47%) | 275 (38%) | 1,803 (45%) |
| many | 219 (27%) | 438 (33%) | 427 (38%) | 343 (48%) | 1,427 (36%) |
| From where I live, the bus and tram stops are … by foot. |  |  |  |  |  |
| very poorly accessible | 33 (4.1%) | 38 (2.9%) | 20 (1.8%) | 4 (0.6%) | 95 (2.4%) |
| rather poorly accessible | 130 (16%) | 179 (14%) | 89 (7.8%) | 32 (4.5%) | 430 (11%) |
| rather well accessible | 344 (43%) | 536 (41%) | 425 (37%) | 186 (26%) | 1,491 (38%) |
| very well accessible | 293 (37%) | 570 (43%) | 602 (53%) | 495 (69%) | 1,960 (49%) |
| In the area I live in, shops and businesses are … by foot. |  |  |  |  |  |
| very poorly accessible | 249 (31%) | 228 (17%) | 82 (7.2%) | 21 (2.9%) | 580 (15%) |
| rather poorly accessible | 192 (24%) | 299 (23%) | 181 (16%) | 109 (15%) | 781 (20%) |
| rather well accessible | 205 (26%) | 423 (32%) | 461 (41%) | 243 (34%) | 1,332 (34%) |
| very well accessible | 154 (19%) | 373 (28%) | 412 (36%) | 344 (48%) | 1,283 (32%) |

Note: participants filled out this questionnaire in a German version which can be accessed here <https://doi.org/10.5445/IR/1000062199>. The English translation is only for comprehensibility and should not be used without further testing.
